# Supplementary material for: Assessment of the Relation between the Expression of Oxaliplatin Transporters in Colorectal Cancer and Response to FOLFOX-4 Adjuvant Chemotherapy: A Case Control Study
Source: PLoS One. 2016 Feb 9;11(2):e0148739. doi: 10.1371/journal.pone.0148739 (PMC4747515; doi:10.1371/journal.pone.0148739)
Supplement: S1 Dataset — (XLSX) [file pone.0148739.s001.xlsx]

## Sheet: PLOS ONE
responder	bmi	right colon	transverse colon	left colon	rectum	targeted_therap	surgery	liver_surgery	height_tum	liver_metastasis	nodes	positive_nodes	tnm_t	tnm_n	tnm_m	resection	differentiation	necrosis	colloid	perineural	emboli	oct1_score	oct2_score	oct3_score	ctr1_score	atp7b_score	chemotherapy	nbe_cu_po	cumul_dose	neurotox_grade	creat_post	relapse	relapse_<1	no_relapse_>3	no_relapse_<3	cea	ca19.9	ki67
Yes	33.126	Unchecked	Unchecked	Checked	Unchecked	No	laparosc_convers	No	3.5	No	16	2	3	1	0	0	moderate	No	No	No	Yes	130	95	5	120	35	Folfox	11 + 1 LF5FU	860	1	70	No	Unchecked	Checked	Unchecked			65
Yes	24.1115	Unchecked	Unchecked	Unchecked	Checked	No	laparotomy	No	7	No	25	3	2	1	0	0	high	No	No	No	No	240	85	65	45	35	Folfox	12	711	1	78	No	Unchecked	Checked	Unchecked			40
Yes	23.6713	Unchecked	Unchecked	Unchecked	Checked	No	laparotomy	No	5	No	19	2	3	1	0	0	high	No	No	No	No	2	100	0	95	4	Folfox	12	808	1	71	No	Unchecked	Checked	Unchecked	1.7	5	35
Yes	25.8645	Unchecked	Unchecked	Checked	Unchecked	No	laparotomy	No	1.7	No	18	1	2	1	0	0	moderate	No	No	No	Yes	160	190	55	125	60	Folfox	12	870	1	118	No	Unchecked	Checked	Unchecked			40
Yes	28.3447	Unchecked	Unchecked	Checked	Unchecked	No	laparotomy	No	4	No	18	3	3	1	0	0	moderate	No	No	No	No	3	55	0	80	0	Folfox	12	968		81	No	Unchecked	Unchecked	Checked			50
Yes	24.6181	Unchecked	Unchecked	Checked	Checked	No	laparotomy	No	2		17	1	2	1	0	0	high	Yes	No	No	No	80	145	0	70	80	Folfox	12	897	1	86	No	Unchecked	Checked	Unchecked			30
Yes	25.7371	Checked	Unchecked	Unchecked	Unchecked	No	laparotomy	No	6.5	No	30	1	3	1	0	0	moderate	No	No	No	Yes	20	110	0	90	5	Folfox	12	1020	1	84	No	Unchecked	Checked	Unchecked	2.5		90
Yes	24.3911	Unchecked	Unchecked	Unchecked	Checked	No	laparotomy	No	3.5	No	7	1	1	1	0	0	ND	No	>50%	No	No	70	110	0	10	45	Folfox	12	591	1	94	No	Unchecked	Checked	Unchecked			10
Yes	23.1911	Checked	Unchecked	Unchecked	Unchecked	No	laparotomy	No	7	No	13	1	3	1	0	0	moderate	No	No	No	No	30	180	30	100	0	Folfox	12	795	1	71	No	Unchecked	Unchecked	Checked	1	16	75
Yes	29.3848	Unchecked	Unchecked	Unchecked	Checked	No	Laparoscopy	No	3	No	10	1	3	1		0	moderate	No	No	No	No	20	130	0	105	1	Folfox	12	834	2	68	No	Unchecked	Checked	Unchecked	3.5	7	80
Yes	22.1003	Checked	Unchecked	Unchecked	Unchecked	No	laparotomy	No	2	No	26	0	4	0	0	0	high	No	No	No	No	160	100	0	95	55	Folfox	2	104	2	106	No	Unchecked	Checked	Unchecked			55
Yes	24.3911	Checked	Unchecked	Unchecked	Unchecked	No	laparotomy	No	5	No	16	3	3	1	0	0	high	No	No	No	No	40	185	85	155	30	Folfox	12	795	1	93	No	Unchecked	Unchecked	Checked			95
Yes	26.6389	Unchecked	Unchecked	Checked	Unchecked	No	laparotomy	No	4.2	No	17	4	3	2	0	0	high	No	No	No	No	120	240	55	110	45	Folfox	12	779	2	71	No	Unchecked	Unchecked	Checked			80
Yes	28.8827	Checked	Unchecked	Unchecked	Unchecked	No	laparotomy	No	6	No	33	7	3	2	0	0	poor	Yes	No	No	Yes	285	190	60	100	90	Folfox	12	622	3	59	No	Unchecked	Unchecked	Checked			70
Yes	29.0659	Unchecked	Unchecked	Checked	Unchecked	No	laparotomy	No	8	No	10	5	3	2	0	0	moderate		< 50%	No	Yes	270	155	140	90	75	Folfox	12	878	1	85	No	Unchecked	Unchecked	Checked	11.7	103	85
No	26.7949	Checked	Unchecked	Unchecked	Unchecked	No	laparotomy	No	3.5	No	12	5	3	2	0	0	moderate	No	< 50%	Yes	Yes	285	170	80	30	95	Folfox	11	878		85	Yes	Checked	Unchecked	Unchecked			55
No	22.6562	Unchecked	Unchecked	Checked	Unchecked	No	laparosc_convers	No	3.5		15	4	3	2	0	0	moderate	No	No	No	Yes	160	145	70	180	80	Folfox	11	705	2	91	Yes	Checked	Unchecked	Unchecked			45
No	25.1039	Checked	Unchecked	Unchecked	Unchecked	No	laparotomy	No	8.5	No	13	9	3	2	0	0	moderate	Yes	No	No	Yes	2	245	195	135	0	Folfox	8	607	3	50	Yes	Checked	Unchecked	Unchecked			60
No	19.2277	Unchecked	Unchecked	Checked	Unchecked	No	laparotomy	No	3.5	No	13	3	3	1	1	0	high	No	< 50%	No	No	70	100	70	180	30	Folfox	10	690	1	65	Yes	Checked	Unchecked	Unchecked			70
No	26.4721	Unchecked	Unchecked	Checked	Unchecked	No	laparosc_convers	No	6.5	No	10	2	3	1	0	0	moderate	No	No	No	No	210	80	155	100	75	Folfox	12	690	1	82	Yes	Checked	Unchecked	Unchecked	4.31	10.28	55
No	23.5666	Unchecked	Unchecked	Checked	Unchecked	No	laparotomy	No	5	No	17	3	4	2	0	0	high	No	>50%	No	No	30	155	50	60	25	Folfox	12	948	1	61	Yes	Checked	Unchecked	Unchecked	1.5		70
No	18.194	Unchecked	Unchecked	Checked	Unchecked	No	Laparoscopy	No	1.5	No	10	0	3	0	0	0	moderate	Yes	No	No	Yes	180	180	140	80	90	Folfox	8	573	3	97	Yes	Checked	Unchecked	Unchecked			60
No	37.0983	Unchecked	Unchecked	Checked	Unchecked	No	laparotomy	No	3	No	11	6	3	2	0	0	moderate	Yes	No	Yes	Yes	240	90	70	10	65	Folfox	10	716	1		Yes	Checked	Unchecked	Unchecked	2.1	35	80
No	23.8498	Unchecked	Unchecked	Checked	Unchecked	No	Laparoscopy	No	3		20	1	4	1	0	0	moderate	No	No	Yes	No	10	245	215	60	2	Folfox	6 + 6 LV5FU2	417	3	60	Yes	Checked	Unchecked	Unchecked	3.8		10
No	47.3469	Unchecked	Unchecked	Checked	Unchecked	No	laparotomy	No	6	No	31	6	3	2	0	0	moderate	No	No	No	Yes	0	190	170	40	1	Folfox	12	850		62	Yes	Checked	Unchecked	Unchecked			40
No	38.8724	Checked	Unchecked	Unchecked	Unchecked	No	laparotomy	No	4.5	No	17	1	3	1	0	0	high	No	No	No	No	60	150	65	80	35	Folfox	2	170		86	Yes	Checked	Unchecked	Unchecked			50
No	26.8274	Checked	Unchecked	Unchecked	Unchecked	No	Laparoscopy	Yes	4	Yes	42	1	3	1	1	0	moderate	No	No	Yes	No	1	180	175	85	0	Folfox	6		2	93	Yes	Checked	Unchecked	Unchecked	74.1	0.6	40
No	32.4467	Checked	Unchecked	Unchecked	Unchecked	No	laparotomy	No	2.5	No	28	1	4	1	0	0	poor	No	No	No	Yes	150	210	180	125	65	Folfox	4	245		42	Yes	Checked	Unchecked	Unchecked	1.2	1.9	50
No	28.3951	Unchecked	Unchecked	Checked	Unchecked	No	laparotomy	Yes	7.5	Yes	23	4	3	2	1	0	moderate	No	< 50%	No	No	1	195	105	145	0	Folfox	12	782	1		Yes	Checked	Unchecked	Unchecked	8.4	89.5	50
No	24.6548	Unchecked	Unchecked	Unchecked	Checked	No	laparotomy	Yes	6	No	8	0	4	0	0	0	moderate	Yes	No	No	No	100	170	100	30	60	Folfox	12			49	Yes	Checked	Unchecked	Unchecked	3.4		60
No	25.3515	Unchecked	Unchecked	Checked	Unchecked	No	laparotomy	Yes	4	No	12	1	3	1	0	0	high	Yes	< 50%	No	No	20	215	235	55	10	Folfox	6	430	1	73	Yes	Checked	Unchecked	Unchecked			40
